# Supplementary material
Source: publisher figshare collection journal article supplement (https://springernature.figshare.com/ndownloader/files/7625494)

## HOXC8 Breast Invasive Carcinoma (TCGA)

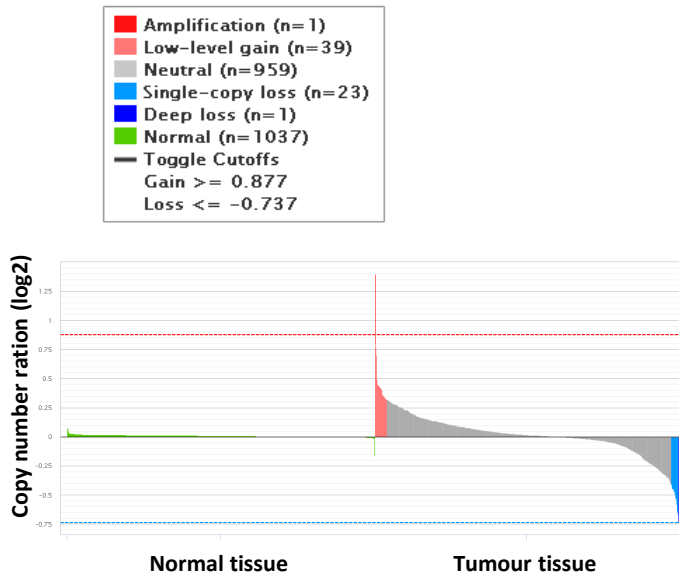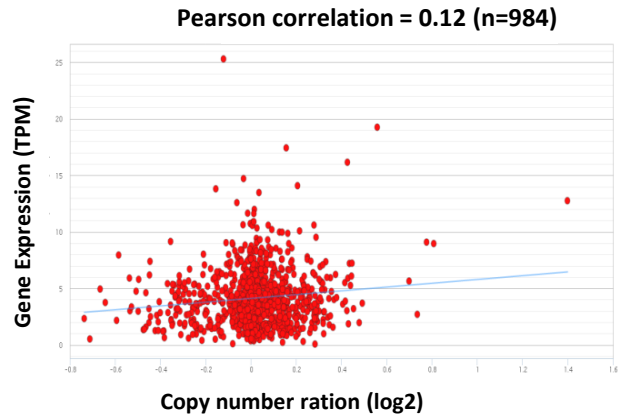

## HOXC8 Breast Cancer (METABRIC)

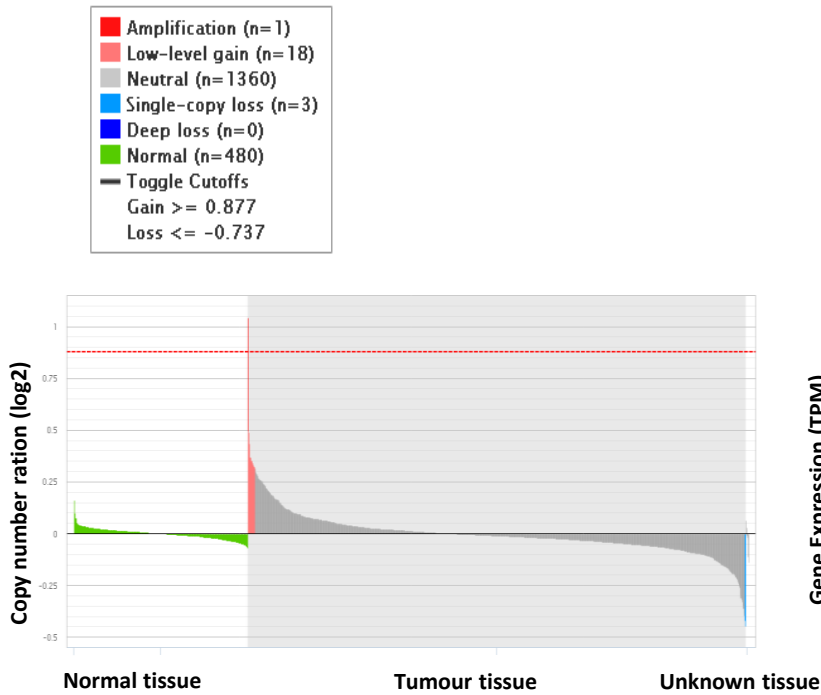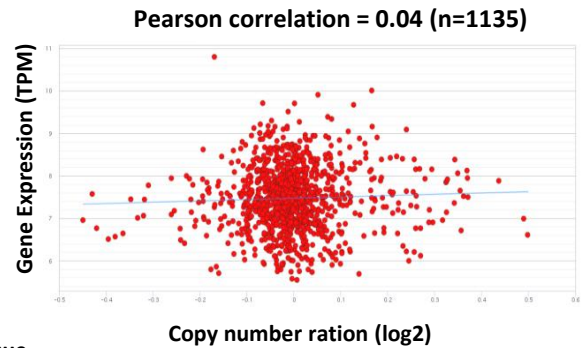

Supplement: Supplementary file [file 7625494]
